# Supplementary material for: Numerical Simulation and Experimental Validation of Liquid Metal Droplet Formation in a Co-Flowing Capillary Microfluidic Device
Source: PubMed Central journal article supplement (PMC7074579; doi:10.3390/mi11020169), 2020-02-05
Supplement: micromachines-11-00169-s001.pdf [file micromachines-11-00169-s001.pdf]

Supplementary Materials

# Numerical Simulation and Experimental Validation of Liquid Metal Droplet Formation in a Co-Flowing Capillary Microfluidic Device

Qingming Hu, Tianyi Jiang and Hongyuan Jiang

Section S1. The Image of the Experimental Setup.

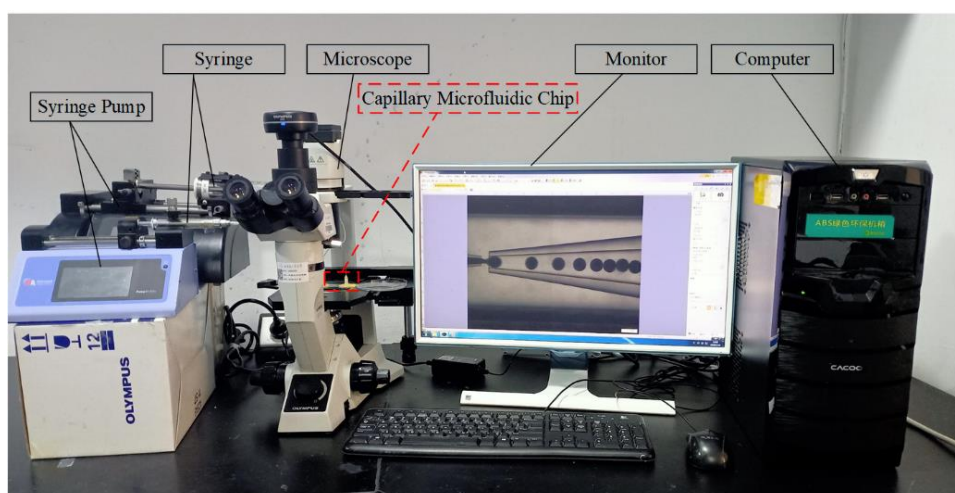

Figure S1. The image of the experimental setup.
